# Supplementary material for: IL-18 Signaling in the Rat Central Amygdala Is Disrupted in a Comorbid Model of Post-Traumatic Stress and Alcohol Use Disorder
Source: MDPI journal article supplement (doi:10.3390/cells12151943), 2023-07-27
Supplement: s1 [file s1]

## Supplementary materials

**Title:** IL-18 signaling in the rat central amygdala is disrupted in a comorbid model of post-traumatic stress and alcohol use disorder.

### Authors:

Vittoria Borgonetti<sup>1\*</sup>, Bryan Cruz<sup>1\*</sup>, Valentina Vozella<sup>1\*</sup>, Sophia Khom<sup>1,2</sup>, Michael Q. Steinman<sup>1</sup>, Ryan Bullard<sup>1</sup>, Shannon D'Ambrosio<sup>1</sup>, Christopher S. Oleata<sup>1</sup>, Roman Vlkolinsky<sup>1</sup>, Michal Bajo<sup>1</sup>, Eric P. Zorrilla<sup>1</sup>, Dean Kirson<sup>1,3</sup> & Marisa Roberto<sup>1#</sup>

### Affiliation:

<sup>1</sup>Department of Molecular Medicine, The Scripps Research Institute, La Jolla, CA, USA 92073

<sup>2</sup>Department of Pharmaceutical Sciences, University of Vienna, Josef-Holaubek-Platz 2, Vienna, A 1090, Austria

<sup>2</sup>Department of Pharmacology, Addiction Science, and Toxicology, The University of Tennessee Health Science Center, Memphis, TN, USA 38163

### Correspondence:

\* These authors contributed equally

# Marisa Roberto, The Scripps Research Institute, Department of Molecular Medicine, 10550 North Torrey Pines Road; La Jolla, California 92037; USA. Email: [mroberto@scripps.edu](mailto:mroberto@scripps.edu)

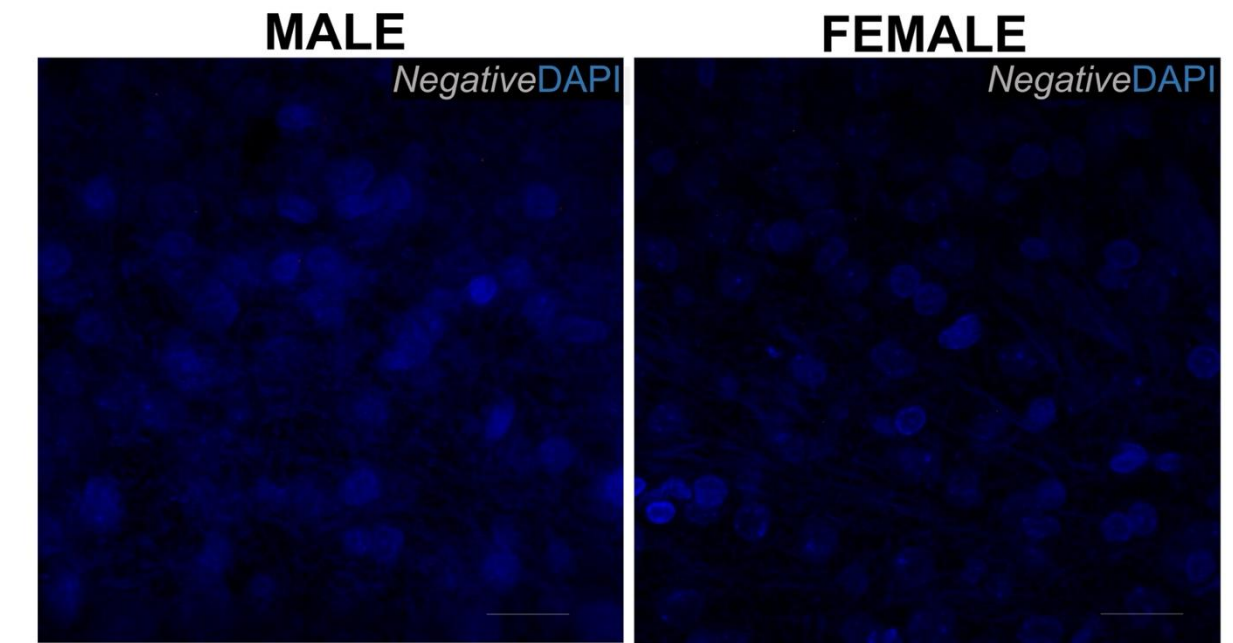

**Supplementary Figure S1** Representative negative control images in the CeA of male and female indicate negligible fluorescence intensity for all the channels. Scale bar: 10  $\mu$ m.
